# Supplementary material for: Mouse Spexin: (I) NMR Solution Structure, Docking Models for Receptor Binding, and Histological Expression at Tissue Level
Source: PubMed Central journal article supplement (PMC8285161; doi:10.3389/fendo.2021.681646), 2021-07-02
Supplement: DataSheet_1.pdf [file DataSheet_1.pdf]

## Supplemental Table 1

### Structure calculation statistics

|                                                 | Mouse SPX       |
|-------------------------------------------------|-----------------|
| Nonredundant upper-limit distance constraints   | 159             |
| Short range $i-j = 1$                           | 106             |
| Medium range $1 < i-j < 5$                      | 49              |
| Long range $i-j \geq 5$                         | 4               |
| Residual NOE target function ( $\text{\AA}^2$ ) | 0.03            |
| Residual NOE distance limit violations          |                 |
| $\geq 0.2 \text{\AA}$                           | 0               |
| Maxium ( $\text{\AA}$ )                         | 0.01            |
| Average violation ( $\text{\AA}$ )              | 0.0006          |
| RMSD from the mean coordinates ( $\text{\AA}$ ) | Residues 5–13   |
| Backbone atoms                                  | $0.02 \pm 0.01$ |
| All heavy atoms                                 | $0.34 \pm 0.09$ |
| Ramachandran statistics for $\Phi$ and $\Psi$   |                 |
| Residues in most favored region (%)             | 100.0%          |
| Residues in additional allowed region (%)       | 0.0%            |
| Residues in generously allowed region (%)       | 0.0%            |
| Residues in disallowed region (%)               | 0.0%            |

(NOE, Nuclear Overhauser effect; RMSD, Root mean square deviation)
