# Supplementary material for: Mouse Spexin: (I) NMR Solution Structure, Docking Models for Receptor Binding, and Histological Expression at Tissue Level
Source: PubMed Central journal article supplement (PMC8285161; doi:10.3389/fendo.2021.681646), 2021-07-02
Supplement: DataSheet_2.pdf [file DataSheet_2.pdf]

### Supplemental Fig.1

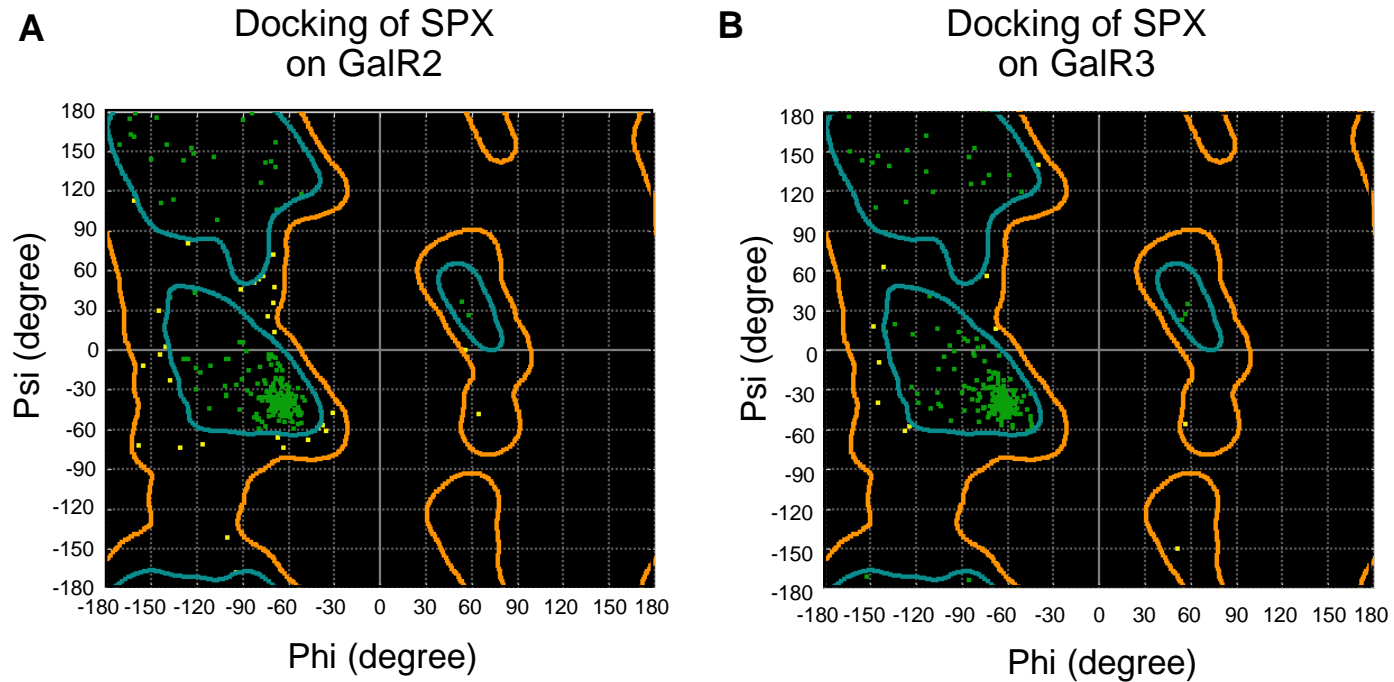

Ramachandran analysis for quality control of structural data for homology modelling of mouse GalR2 and GalR3. The Phi-Psi plots of the respective data for (A) GalR2 and (B) GalR3 reveal that all the data are within the most favored region (green dots within the areas covered by blue line) and additional allowed region (yellow dots within the areas covered by orange line) but not in the generously allowed/disallowed region, indicating that the results of our receptor modelling are of good quality.
